# Supplementary material
Source: PubMed Central journal article supplement (PMC10893965)
Supplement: NIHMS1948901-supplement-Supplementary.pdf [file NIHMS1948901-supplement-Supplementary.pdf]

## A Supplemental figures

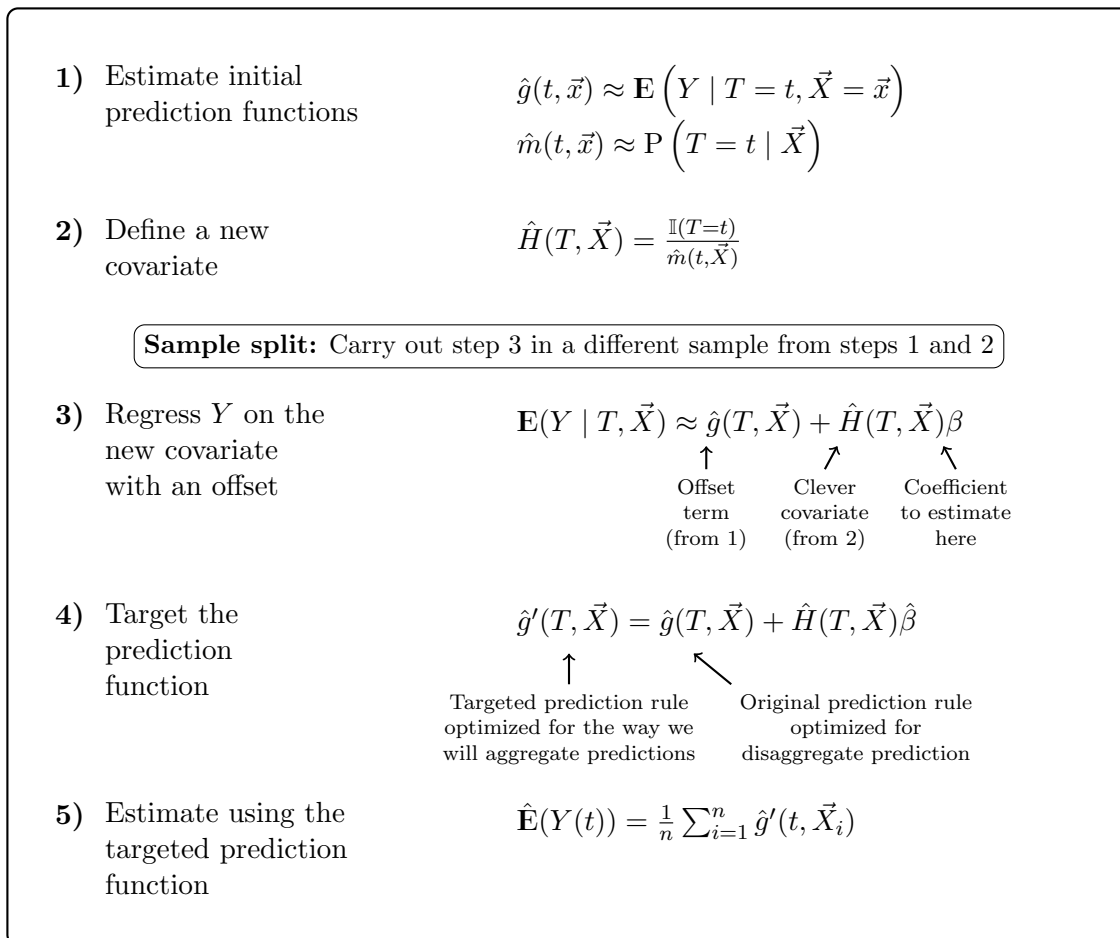

**Fig. 12. Targeted learning with a continuous outcome.** This method is analogous to the method for a binary outcome presented in Figure 11. We include the continuous version here for comparison with double machine learning (Appendix Figure 13).

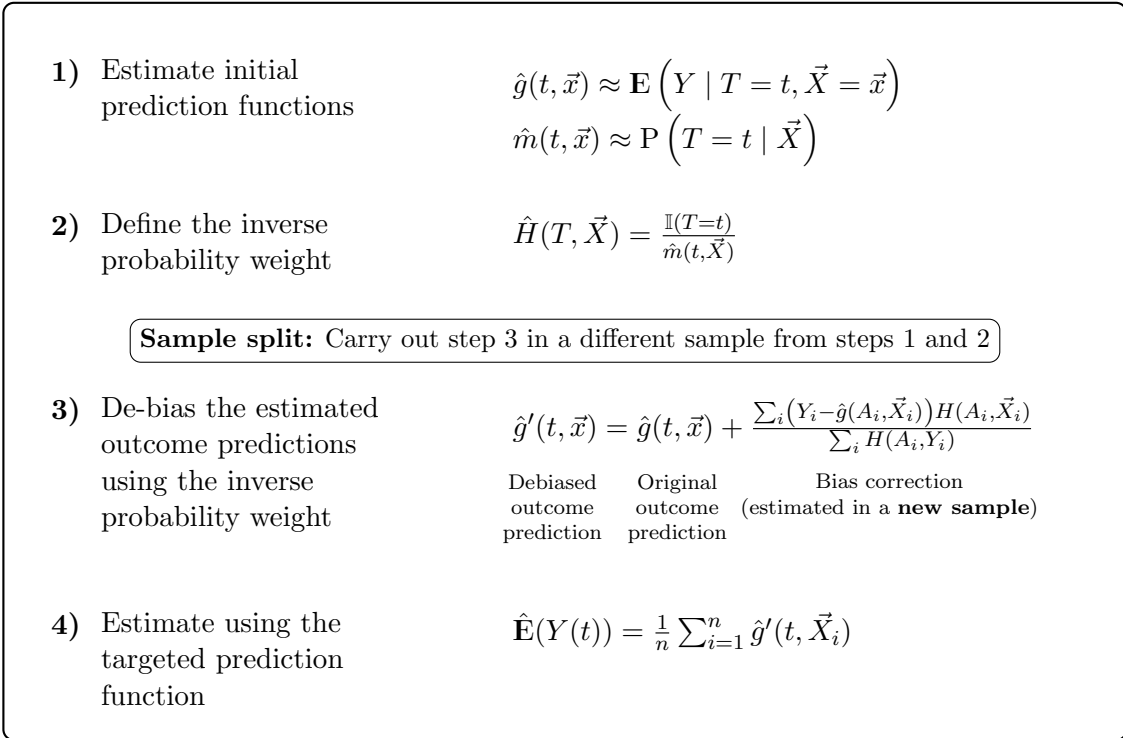

**Fig. 13. Double machine learning.** This figure presents double machine learning (Chernozhukov et al., 2018) using the notation of targeted learning (Van der Laan and Rose, 2018) in order to emphasize the parallels between the two methods. For targeted learning with a continuous outcome, see Appendix Figure 12. For targeted learning with a binary outcome, see Figure 11.
